# Supplementary material for: Transcriptome Analysis of Potato Leaves Expressing the Trehalose-6-Phosphate Synthase 1 Gene of Yeast
Source: PubMed Central journal article supplement (PMC3156770; doi:10.1371/journal.pone.0023466), 2011-08-16
Supplement: pone.0023466.s001.pdf [file pone.0023466.s001.pdf]

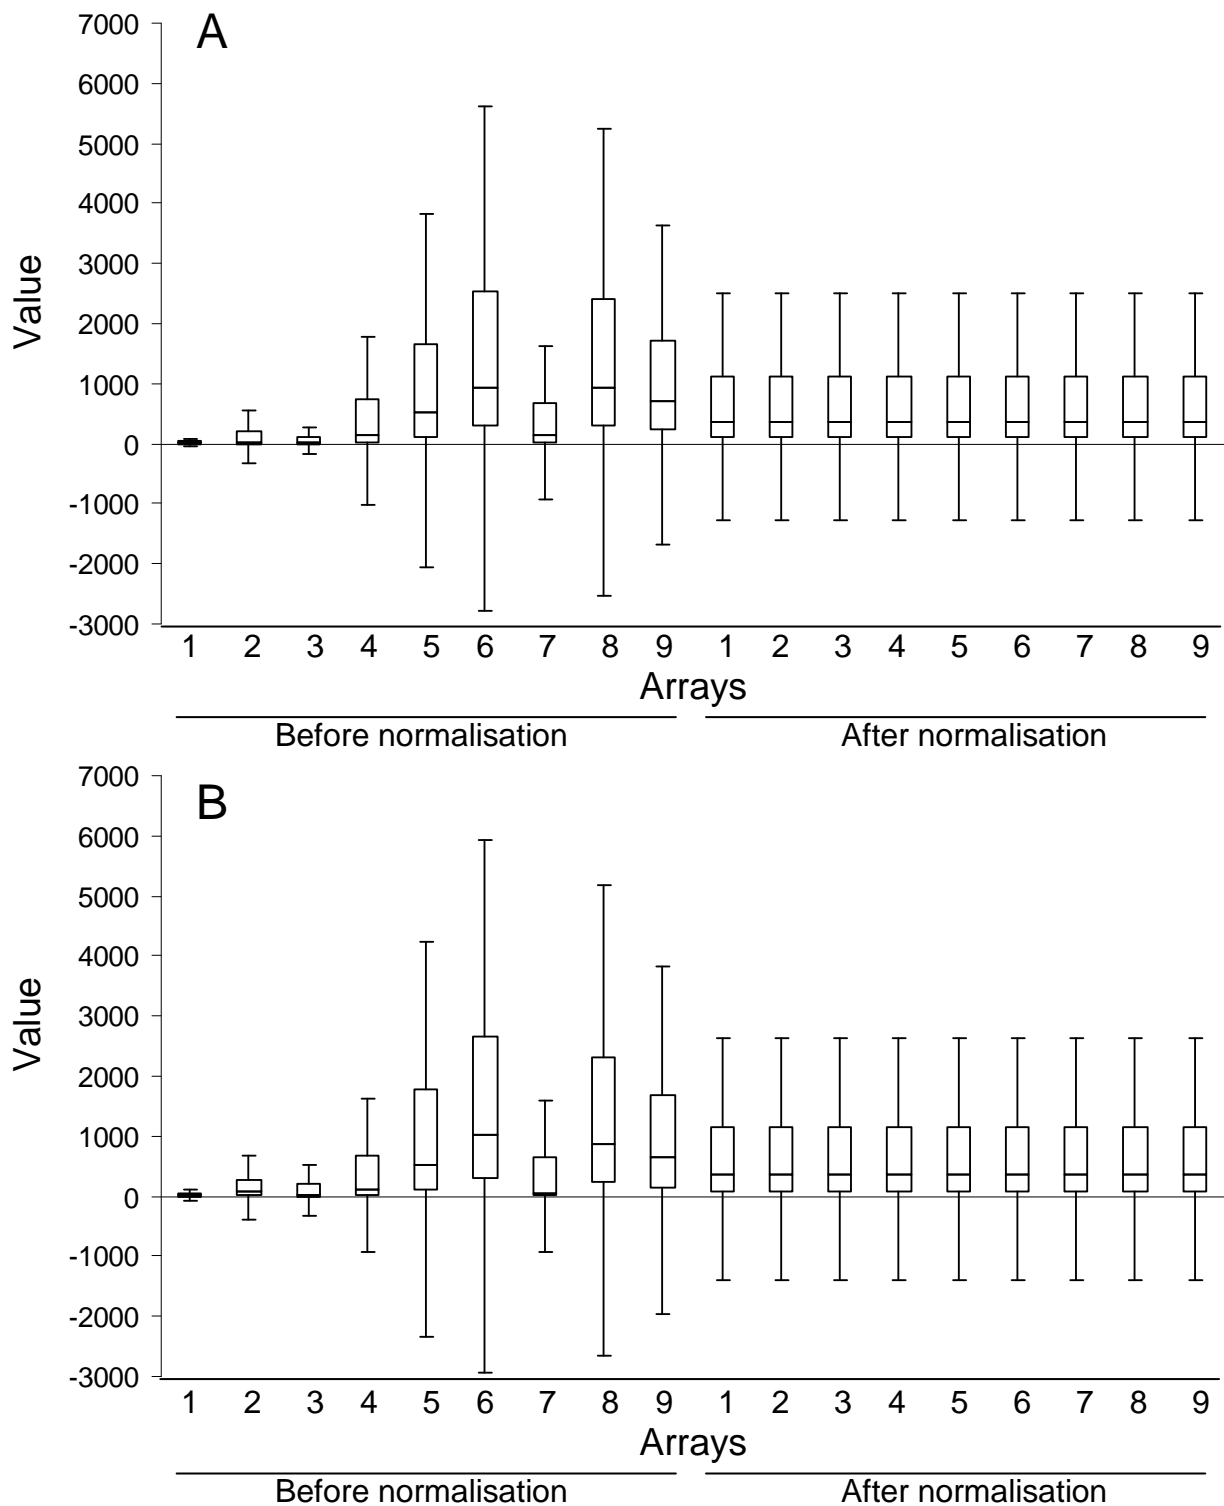

**Figure S1. Between array normalisation of microarray data.**  
 Data for *TPS1*-transgenic (A) and wild-type plants (B) from nine microarrays were quantile normalised.
