# Supplementary material for: Transcriptome Analysis of Potato Leaves Expressing the Trehalose-6-Phosphate Synthase 1 Gene of Yeast
Source: PLoS One. 2011 Aug 16;6(8):e23466. doi: 10.1371/journal.pone.0023466 (PMC3156770; doi:10.1371/journal.pone.0023466)
Supplement: Table S3 — Transcription factors binding to the promoter region of putative Arabidopsis orthologs of differentially expressed potato genes. (XLS) [file pone.0023466.s005.xls]

## Sheet: Munka2
Table S3. Transcription factors, which bind to the promoter of the Arabidopsis orthologs of the assigned potato genes. Grey colour indicates TF binding. Transcription factors from the microarray experiments are in bold in column B.
			Transcription factors
MapMan main Bin number	At ortholog	Description and Arabidopsis gene name	Other bZIP_DOF	Other CBF	Other HOX2a_HOX2a	Other MADS_MADS	Other MYC_MYB	Other RAV	Other TBP	Other TSS	ABI3/VP1 ARF1	ABI3/VP1 AtLEC2	AP2/EREBP ABI4(1)	AP2/EREBP ABI4(2)	AP2/EREBP NtERF2	AP2/EREBP RAP2.2	AP2/EREBP RAV1(1)	AP2/EREBP RAV1(2)	AP2/EREBP TEIL	bHLH OsbHLH66	bHLH PIF3(2)	bZIP ABF1	bZIP HY5	bZIP O2	bZIP STF1	bZIP TGA1	bZIP TGA1a	C2C2(Zn) Dof DOF2	C2H2(Zn) ID1	C2H2(Zn) TAC1	CAMTA AtSR1	GARP ARR10	GARP/ARR-B ARR1	GARP/ARR-B ARR2	GATA AGP1	C2C2(Zn) GATA GATA-1	C2C2(Zn) GATA GATA-2	C2C2(Zn) GATA GATA-3	C2C2(Zn) GATA GATA-4	HD-HOX ZmHOX2a(1)	HD-HOX ZmHOX2a(2)	HD-KNOTTED HVH21	HD-PHD ALFIN1	HD-ZIP ATHB1	HD-ZIP ATHB5	HD-ZIP ATHB9	HD-ZIP HAHB4	MADS AG	MADS AGL1
1	AT1G67740	Photosystem II core complex proteins (psbY)
1	AT5G38410	Rubisco small subunit (RBCS-3B)
1	AT1G56190	Phosphoglycerate kinase (PGK1)
1	AT4G38970	Fructose-bisphosphate aldolase (FBA)
2	AT3G08580	Adenine nucleotide carrier protein (ANT1)
2	AT4G02280	Sucrose synthase (SUS3)
8	AT1G01090	Pyruvate dehydrogenase E1 alpha subunit (PDH-E1)
17	AT3G16050	A37 protein, pyridoxine biosynthesis protein (PDX1.2)
17	AT1G75750	Snakin2 (SN2)
20	AT1G59860	17.6 kDa class I heat shock protein (HSP17.6A-CI)
21	AT1G17020	Leucoanthocyanidin dioxygenase (LDOX)
21	AT5G06290	Thioredoxin peroxidase (TPX1)
21	AT4G35090	Catalase (CAT2)
23	AT4G09320	Nucleoside diphosphate kinase 1 (NDPK1)
26	AT1G15390	Peptide deformylase (PDF1A)
26	AT5G16990	Ally-alcohol dehydrogenase (ADH)
26	AT5G22300	Bifunctional nitrilase/nitrile hydratase (NIT4B)
26	AT2G44300	Non-specific lipid transfer protein
26	AT2G10940	Proline-rich protein
26	AT2G32030	GCN5-related N-acetyltransferase (GNAT)
27	AT3G44260	CCR4-associated factor
27	AT1G14510	Alfin1-like transcription factor (AL7)
27	AT5G66320	AG-motif binding protein 4 /C2C2 GATA Zinc finger TF (AGP4)
27	AT5G60910	Agamous-like 8 MADS-box protein (AGL8)
27	AT4G24540	Agamous-like 24 MADS-box protein (AGL24)
27	AT4G24770	31-kDa RNA binding protein (RBP31)
27	AT1G54080	Oligouridylate binding protein
27	AT3G15010	Nuclear ribonucleoprotein A1
28	AT4G40030	Histone H3.2 (H3)
29	AT5G27700	40S ribosomal protein S21 (RPS21e)
29	AT5G64140	40S ribosomal protein S28 (RPS28)
29	AT4G00820	Calmodulin binding protein (SUI1B)
29	AT1G07940	Calmodulin binding / translation elongation factor (EF1a)
29	AT5G45390	ATP-dependent Clp protease (CLPP4)
29	AT2G02760	Ubiquitin-protein ligase (UBC2)
29	AT3G14250	Putative ubiquitin conjugating enzyme
29	AT1G15670	Kelch repeat-containing F-box family protein
29	AT3G27430	Proteasome subunit beta type-7-A (PBB1)
29	AT1G47250	Proteasome subunit alpha-type (PAF1)
30	AT5G38480	14-3-3 protein 4 (TFT4)
31	AT5G56600	Profilin 3 (PRO)
31	AT5G09810	Actin 7 (ACT7)
33	AT4G02620	Vaculoar ATPase subunit F
34	AT1G19910	Vacuolar-H+-pumping ATPase 16 kDa subunit (AVA-P2)
34	AT1G55910	Putative zinc transporter (ZIP11)
34	AT5G65380	Multidrug resistance pump
[truncated: 23 more columns]
